# THE AMERICAN JOURNAL OF PSYCHIATRY

## EDITOR-IN-CHIEF

Robert Freedman, M.D.

## DEPUTY EDITORS

David A. Lewis, M.D.

Robert Michels, M.D.

Daniel S. Pine, M.D.

Susan K. Schultz, M.D.

Carol A. Tamminga, M.D.

## EDITORIAL STAFF

**Executive Editor**  
Michael D. Roy

**Senior Editor/Features Writer**  
Jane Weaver, E.L.S.

**Senior Editor**  
John J. Guardiano, Ph.D.

**Production Manager**  
Susan Westrate

**Assistant Editors**  
Katie Duffy  
Angela Moore

**Editorial Support Services  
Manager**  
Nicole Gray

**Editorial Assistant**  
Linda LaCour

**Editorial Assistant/  
Permissions Coordinator**  
Heidi Koch

**Assistants to the Editors**  
Lois Lilienthal  
Laura English  
Rachel Hogg  
Russell A. Scholl

## ASSOCIATE EDITORS

Alan Brown, M.D., M.P.H.

Linda Brzustowicz, M.D.

Tyrone Cannon, Ph.D.

Benjamin G. Druss, M.D., M.P.H.

Graham J. Emslie, M.D.

Daniel C. Javitt, M.D.

Bankole Johnson, M.D.

Ellen Leibenluft, M.D.

Douglas F. Levinson, M.D.

Constantine G. Lyketsos,  
M.D., M.H.S.

Barbara Milrod, M.D.

Jerrold F. Rosenbaum, M.D.

A. John Rush, M.D.

Patricia Suppes, M.D., Ph.D.

Anita Thapar, M.B.B.Ch.,  
F.R.C.Psych., Ph.D., F.Med.Sci.

Mauricio Tohen, M.D.,  
Dr.PH., M.B.A.

Eduard Vieta, M.D., Ph.D.

## EDITOR EMERITA

Nancy C. Andreasen, M.D., Ph.D.

## FORMER EDITORS

Amariah Brigham, M.D.  
1844-1849

T. Romeyn Beck, M.D.  
1849-1854

John P. Gray, M.D.  
1854-1886

G. Alder Blumer, M.D.  
1886-1894

Richard Dewey, M.D.  
1894-1897

Henry M. Hurd, M.D.  
1897-1904

Edward N. Brush, M.D.  
1904-1931

Clarence B. Farrar, M.D.  
1931-1965

Francis J. Braceland, M.D.  
1965-1978

John C. Nemiah, M.D.  
1978-1993

# THE AMERICAN PSYCHIATRIC ASSOCIATION

1000 Wilson Blvd., Suite 1825, Arlington, VA 22209-3901  
(888) 357-7924 (toll-free inside the U.S. and Canada) / (703) 907-7300  
web site: [www.psychiatry.org](http://www.psychiatry.org) • e-mail: [apa@psych.org](mailto:apa@psych.org)

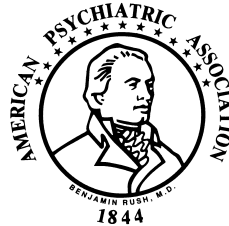

## OFFICERS 2014–2015

|                        |                        |
|------------------------|------------------------|
| <b>President</b>       | Paul Summergrad, M.D.  |
| <b>President-Elect</b> | Renée L. Binder, M.D.  |
| <b>Treasurer</b>       | Frank W. Brown, M.D.   |
| <b>Secretary</b>       | Maria A. Oquendo, M.D. |

## ASSEMBLY

|                      |                                   |
|----------------------|-----------------------------------|
| <b>Speaker</b>       | Jenny L. Boyer, M.D., Ph.D., J.D. |
| <b>Speaker-Elect</b> | Glenn A. Martin, M.D.             |
| <b>Recorder</b>      | Daniel J. Anzia, M.D.             |

## OFFICE OF THE CEO AND MEDICAL DIRECTOR

**CEO and Medical Director** Saul Levin, M.D., M.P.A.

## BOARD OF TRUSTEES

|                         |                                 |                        |
|-------------------------|---------------------------------|------------------------|
| Jeffrey Akaka, M.D.     | Jeffrey L. Geller, M.D., M.P.H. | John M. Oldham, M.D.   |
| R. Scott Benson, M.D.   | Dilip V. Jeste, M.D.            | Vivian B. Pender, M.D. |
| Lara J. Cox, M.D., M.S. | Judith F. Kashtan, M.D.         | Gail E. Robinson, M.D. |
| Brian Crowley, M.D.     | Jeffrey A. Lieberman, M.D.      | Ravi N. Shah, M.D.     |
| Anita S. Everett, M.D.  | Molly K. McVoy, M.D.            | Melinda Young, M.D.    |

## PUBLISHER

Rebecca D. Rinehart

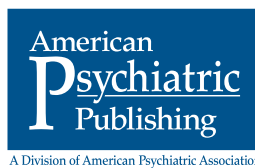

The American Journal of Psychiatry is online at [ajp.psychiatryonline.org](http://ajp.psychiatryonline.org)

THE AMERICAN PSYCHIATRIC ASSOCIATION  
Chairpersons of Councils, Commissions, Committees, and Task Forces

Standing Committees

**Bylaws**

Rebecca W. Brendel, M.D., J.D.

**Elections**

Barry K. Herman, M.D.

**Ethics**

Richard D. Milone, M.D.

**Finance and Budget**

Alan F. Schatzberg, M.D.

*Audit*

Frank W. Brown, M.D.

*Investment Oversight*

David Fassler, M.D.

**Joint Reference**

Renée L. Binder, M.D.

**Membership**

Rahn K. Bailey, M.D.

**Nominating**

Jeffrey A. Lieberman, M.D.

**Tellers**

Hind Benjelloun, M.D.

**Council on Addiction Psychiatry**

Frances R. Levin, M.D.

**Council on Advocacy and Government Relations**

Barry B. Perlman, M.D.

*Advocacy and Litigation Funding*

Jack Drescher, M.D.

*Caucus of State Hospital Psychiatrists*

*Caucus of VA Psychiatrists*

**Council on Children, Adolescents, and Their Families**

Louis J. Kraus, M.D.

*Agnes Purcell McGavin Award*

Christopher J. McDougale, M.D.

*Blanche F. Ittleson Research Award*

*Caucus of Psychiatrists Treating Persons With Intellectual Disabilities*

*College Mental Health Caucus*

**Council on Communications**

Raymond J. DePaulo, M.D.

**Council on Geriatric Psychiatry**

Robert P. Roca, M.D.

**Council on Healthcare Systems and Financing**

Harsh K. Trivedi, M.D.

*Reimbursement for Psychiatric Care*

Bruce J. Schwartz, M.D.

*RBRVS, Codes and Reimbursement*

Ronald M. Burd, M.D.

**Council on International Psychiatry**

Dilip V. Jeste, M.D.

*Caucus on Global Mental Health and Psychiatry*

**Council on Medical Education and Lifelong Learning**

Richard F. Summers, M.D.

*APA Public Psychiatry Fellowship Selection Committee*

Christina V. Mangurian, M.D.

*APA/SAMHSA Minority Fellowship Selection and Advisory*

Altha J. Stewart, M.D.

*Caucus on MOC Issues*

*Caucus of Resident-Fellow Members*

*Scientific Program*

Philip R. Muskin, M.D.

*Scientific Program Committee of the Institute on Psychiatric Services*

Hunter L. McQuiston, M.D.

*Subcommittee on Joint Sponsorship of Continuing Medical Education (CME)*

*Vestermark Award Committee*

Jonathan F. Borus, M.D.

**Council on Minority Mental Health and Health Disparities**

Sandra C. Walker, M.D.

*Caucus of Rural Psychiatrists*

*Caucus on Religion, Spirituality and Psychiatry*

**Council on Psychiatry And Law**

Steven K. Hoge, M.D.

*Caucus of Correctional Psychiatrists*

*Isaac Ray/Human Rights Award*

Mardoche Sidor, M.D.

*Judicial Action*

Paul S. Appelbaum, M.D.

*Manfred S. Guttmacher Award*

David A. Lowenthal, M.D.

**Council on Psychosomatic Medicine (Consultation Liaison Psychiatry)**

David F. Gitlin, M.D.

**Council on Quality Care**

Joel Yager, M.D.

*Mental Health Information Technology*

Steven Roy Daviss, M.D.

*Steering Committee on Practice Guidelines*

Michael J. Vergare, M.D.

**Council on Research**

Dwight L. Evans, M.D.

*Caucus of Psychiatrists Treating Persons with Eating Disorders*

*Caucus on Alternative and Complementary Medicine*

*Psychiatric Dimensions of Disasters*

Charles R. Marmar, M.D.

*Research Awards*

B. Timothy Walsh, M.D.

*Task Force to Revise the Practice of Electroconvulsive Therapy*

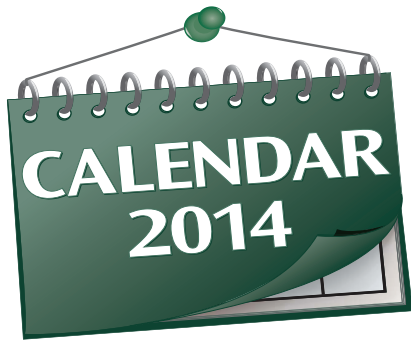

For free listing of your organization's official annual or regional meeting, please send us the following information: sponsor, location, inclusive dates, type and number of continuing education credits (if available), and the name, address, and telephone number of the person or group to contact for more information. In order for an event to appear in our listing, all notices and changes must be received at least 6 months in advance of the meeting and should be addressed to:

**Calendar, American Journal of Psychiatry, 1000 Wilson Boulevard, Suite 1825, Arlington, VA 22209-3901, [swestrate@psych.org](mailto:swestrate@psych.org) (e-mail).**

Because of space limitations, only listings of meetings of the greatest interest to Journal readers may be included.

## OCTOBER

**October 11–12**, 15th Joint Meeting, American Academy of Psychoanalysis and Dynamic Psychiatry (AAPDP) with Organizzazione di Psicoanalisti Italiani Federazione e Registro (OPI-FER), Pisa, Italy. Contact: [info@AAPDP.org](mailto:info@AAPDP.org) (e-mail), [www.AAPDP.org](http://www.AAPDP.org) (web site).

**October 16–18**, Third International Congress on Borderline Personality Disorder and Allied Disorders (Tailoring treatments to different developmental pathways and phenomenologies), European Society for the Study of Personality Disorders

(ESSPD) with International Society for the Study of Personality Disorder (ISSPD), Rome, Italy. Contact: [borderline2014@cpo-hanser.de](mailto:borderline2014@cpo-hanser.de) (e-mail), [www.esspd.eu](http://www.esspd.eu) (web site), [www.borderline-congress.org](http://www.borderline-congress.org) (conference information).

**October 30–November 2**, 66th Institute on Psychiatric Services, San Francisco, CA. [www.psychiatry.org/ips](http://www.psychiatry.org/ips) (web site).

## FEBRUARY 2015

**February 11–15**, 20th Annual Psychopharmacology Update from.

Paris Hotel, Las Vegas, Nevada. Sponsored by The Nevada Psychiatric Association. Contact: (877) 493-0007 (phone); [www.nvpsychiatry.org](http://www.nvpsychiatry.org) (web site).

**February 16–19**, Update on Psychiatry: Continuing a Proud 23 Year Tradition. JW Marriott Starr Pass Resort, Tucson, Arizona. Sponsored by: Univ. of Arizona College of Medicine, Department of Psychiatry; Arizona Psychiatric Society; Arizona Psychological Association. Contact: [uapsycon@email.arizona.edu](mailto:uapsycon@email.arizona.edu) (e-mail); (520) 626-1392 (phone); [www.psychopharm.arizona.edu](http://www.psychopharm.arizona.edu) (web site).

# An essential digital companion to the DSM-5®

*NEW! – Now Spanish language supported!*

## DSM-5® Diagnostic Criteria Mobile App

American Psychiatric Association

The **DSM-5® Diagnostic Criteria Mobile App** is designed to help mental health practitioners, researchers and students fully integrate the new DSM criteria and codes into their practice and study. Users have full offline access to all of the criteria sets as well as online access to supporting videos, commentary and resources. Powerful search and customization tools aid and enhance assessment of symptom presentations in a variety of clinical and administrative settings. It features:

- Access to the complete DSM-5® diagnostic criteria sets on your phone and tablet
- Up to date access to ICD-9-CM and ICD-10-CM codes for clinical and administrative use
- Video commentary from the DSM-5 task force members highlighting changes from DSM-IV to DSM-5
- Robust disorder, acronym, code and symptom search functionality
- Bookmarking allows customization of the criteria sets most commonly referenced

Available for both iOS and Android compatible devices through the iTunes store and Google Play.

As the DSM-5® Diagnostic Criteria Mobile App is only available for sale through the iTunes and Android stores, it is not possible for us to extend our traditional APA Member or APA Resident-Fellow Member discounts on the purchase of this product.

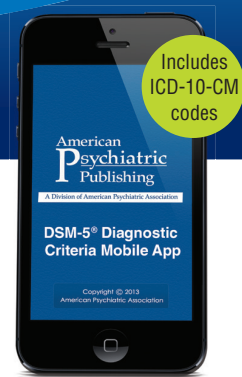

# There's So Much More to AJP Than Meets the Page!

Visit *The American Journal of Psychiatry's* website on PsychiatryOnline for the following features!

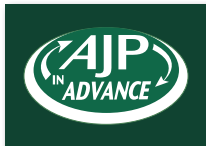

## AJP in Advance

**The very latest research advances!**

At **AJP in Advance**, you can discover the following before their appearance in print:

### Long-Term Effectiveness of Supported Employment

Broad and sustained long-term benefits for supported employment intervention were demonstrated in severely mentally ill adults in Switzerland who were randomly assigned to either a supported employment intervention or a traditional vocational rehabilitation program, highlighting the potential utility of similar approaches for clinicians.

### Low, Moderate Dosages of Extended-Release Quetiapine in Borderline Personality Disorder

Both low-dosage and high-dosage extended-release quetiapine reduced the overall severity of borderline personality disorder symptoms when compared with placebo, but adverse events were more likely in the high-dosage group.

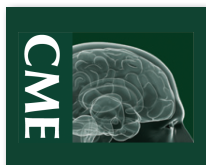

## AJP CME

Three articles in this issue form the basis of a short course with questions that can be answered for up to 1 *AMA PRA Category 1 Credit™* each by visiting <http://psychiatryonline.org/cme.aspx> and clicking on the "American Journal of Psychiatry" tab.

CME credit is issued only online, and a paid subscription to AJP CME course program is required. This month's courses appear on pages 1135–1138.

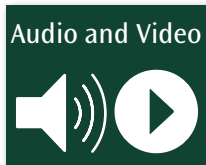

Audio and Video

## Have You Heard?

With AJP Audio you can listen to highlights of this issue. This month, Executive Editor Michael Roy discusses relapse prevention in pediatric depression with sequential fluoxetine and CBT, the risk of a mania switch in bipolar depression treated with antidepressant monotherapy versus an antidepressant plus mood stabilizer, adverse neuropsychiatric effects of glucocorticoid medications, the patient-therapist relationship in psychotherapy, long-term outcomes of psychodynamic therapy and CBT in social anxiety disorder, and the case of a man in Cambodia with seizures, anorexia, and depression. Also, visit the online edition of this month's Journal and click "In This Issue" to view a video of Deputy Editor Daniel S. Pine, M.D., presenting highlights from the issue.

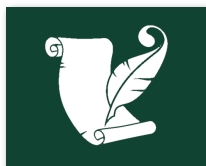

## Revisit the field's rich history!

### 50 years ago this month: Alaska Earthquake

A first-hand account of the aftermath of the Great Alaskan Earthquake, from the Alaska Psychiatric Institute in Anchorage. The well-built hospital structure suffered power and water outages, but no major damage. "Our nurses promptly put the patients to work, which as everyone knows is the best way of preventing panic and fear." Aftershocks, some of them severe, continued for weeks.

### 125 years ago this month: Cerebral Localization

"It is well in our specialty, from time to time to review the immediate past history of each of its branches, so constant is the progress in the study of mental diseases." The author reviews the state of knowledge about cerebral localization, as gleaned from anatomical study, animal studies, autopsies, clinical correlation, and brain surgery.

# The Residents' JOURNAL

## THE AMERICAN JOURNAL OF PSYCHIATRY RESIDENTS' JOURNAL

August 2014

Volume 9

Issue 8

### Inside

- 2 REM Sleep Behavior Disorder  
Nathan Bruce, D.O.  
Rohit Madan, M.D.
- 5 Pharmacologic Management of Agitation and Aggression in Patients With Traumatic Brain Injury  
Arundhati Undurti, M.D., Ph.D.
- 8 Preoperative Dose of Olanzapine in the Prevention of Postoperative Delirium  
Kristin V. Escamilla, M.D.  
Isela A. Werchan, M.D.
- 10 Successful Continuation of an ECT Course After a Tardive Spontaneous Seizure  
Maria J. Julius Costa, M.D.
- 13 On Becoming a Local Healer of Global Mental Health Problems  
Suni Jani, M.D., M.P.H.
- 15 The Perks of Being a Wallflower  
Natasha D. Smith, M.D., M.P.H.
- 16 Residents' Resources
- 18 Author Information and Upcoming Themes

### In This Issue

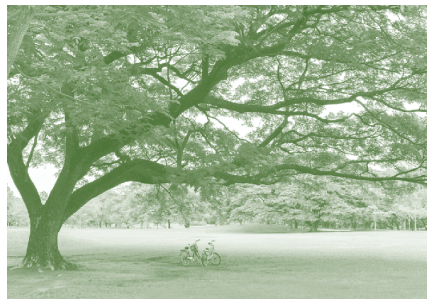

In this issue of the *Residents' Journal*, Nathan Bruce, D.O., and Rohit Madan, M.D., discuss the clinical features of REM sleep behavior disorder, how it is diagnosed, and treatment options. In a treatment in psychiatry article, Arundhati Undurti, M.D., Ph.D., provides data on the evaluation and management of agitation and aggression in patients with traumatic brain injury. In a case report, Kristin V. Escamilla, M.D., and Isela A. Werchan, M.D., discuss the benefits of a preoperative dose of olanzapine administered to a patient with a history of postoperative delirium. Maria J. Julius Costa, M.D., reports on a case of successful continuation of an ECT course following tardive spontaneous seizure in a patient with major depressive disorder. Suni Jani, M.D., M.P.H., comments on her experience as a psychiatry resident visiting families with children with developmental disabilities in India, the cumulative global impact of mental disorders, and the state of global psychiatry. In a film review, Natasha D. Smith, M.D., M.P.H., discusses *The Perks of Being a Wallflower* and how such movies can help reduce the stigma of adolescent mental illness.

Editor-in-Chief  
Misty Richards, M.D., M.S.

Senior Deputy Editor  
Rajiv Radhakrishnan, M.B.B.S., M.D.

Deputy Editor  
Tobias Wasser, M.D.

Associate Editors  
Ijeoma Chukwu, M.D., M.P.H.  
Kathleen Mary Patchan, M.D.

Media Editor  
Holly S. Peek, M.D., M.P.H.

Staff Editor  
Angela Moore

Editors Emeriti  
Sarah B. Johnson, M.D.  
Molly McVey, M.D.  
Joseph M. Cerimele, M.D.  
Sarah M. Fayad, M.D.  
Monifa Seawell, M.D.  
Arshya Vahabzadeh, M.D.

### Editor-in-Chief

Misty Richards, M.D., M.S.

### Senior Deputy Editor

Rajiv Radhakrishnan, M.B.B.S., M.D.

### Deputy Editor

Tobias Wasser, M.D.

### Associate Editors

Ijeoma Chukwu, M.D., M.P.H.

Kathleen Mary Patchan, M.D.

### Media Editor

Holly S. Peek, M.D., M.P.H.

*The Residents' Journal* accepts manuscripts authored by medical students, resident physicians, and fellows. To submit your paper, please visit the manuscript submission site at [mc.manuscriptcentral.com/appi-ajp](http://mc.manuscriptcentral.com/appi-ajp) and either create an account or use your existing account. For manuscript type, select "Residents." Then follow the instructions to upload your manuscript. Residents who are interested in participating as Guest Section Editors should e-mail *The Residents' Journal* Editor-in-Chief Misty Richards at [misty.richards@gmail.com](mailto:misty.richards@gmail.com).

*The Residents' Journal* is sent free-of-charge to all psychiatry residents. Anyone interested in being included on the distribution list should contact Angela Moore, *The Residents' Journal* staff editor at [ajp@psych.org](mailto:ajp@psych.org) with "Subscribe to Residents' Journal" in the subject line.

To access the complete Residents' Journal archives, visit [ajp.psychiatryonline.org/residents\\_journal.aspx](http://ajp.psychiatryonline.org/residents_journal.aspx)



## Contents

- A9 Editorial Board  
A11 Highlights of this issue

## Editorial

- 169 **Psychopathology as the basic science of psychiatry**  
G. Stanghellini and M. R. Broome

## Review article

- 171 **The psychiatric ward as a therapeutic space: systematic review**  
C. Papoulias, E. Csipke, D. Rose, S. McKellar and T. Wykes

## Papers

- 177 **Discharges to prison from medium secure psychiatric units in England and Wales**  
M. Doyle, J. Coid, L. Archer-Power, L. Dewa, A. Hunter-Didrichsen, R. Stevenson, V. Wainwright, C. Kallis, S. Ullrich and J. Shaw
- 183 **Cancer incidence in people with affective disorder: nationwide cohort study in Taiwan, 1997–2010**  
Y.-N. Hung, S.-Y. Yang, M.-C. Huang, F.-W. Lung, S.-K. Lin, K.-Y. Chen, C.-J. Kuo and Y.-Y. Chen
- 189 **Behavioural and psychiatric symptoms in people with dementia admitted to the acute hospital: prospective cohort study**  
E. L. Sampson, N. White, B. Leurent, S. Scott, K. Lord, J. Round and L. Jones
- 197 **Mental and physical illness in caregivers: results from an English national survey sample**  
L. Smith, J. Onwumere, T. Craig, S. McManus, P. Bebbington and E. Kuipers
- 204 **Functional connectivity and grey matter volume of the striatum in schizophrenia**  
K. Koch, O. G. Rus, T. J. Reeß, C. Schachtzabel, G. Wagner, C. C. Schultz, C. Sorg and R. G. M. Schlosser

- 213 **On Bereavement: Studies of Grief in Adult Life by Colin Murray Parkes – reflection**  
Jan Oyebo

- 214 **Starting lithium prophylaxis early v. late in bipolar disorder**  
L. V. Kessing, E. Vradi and P. K. Andersen

- 220 **To L.H.B. (1894–1915) – poem**  
Katherine Mansfield

- 221 **Suspicious young minds: paranoia and mistrust in 8- to 14-year-olds in the UK and Hong Kong**  
K. K. Wong, D. Freeman and C. Hughes

- 229 **Arjuna and Job: depression relieved by submission to gods – psychiatry and sacred texts**  
John Scott Price and Russell Gardner Jr

- 230 **Impact of the diagnostic changes to post-traumatic stress disorder for DSM-5 and the proposed changes to ICD-11**  
M. L. O'Donnell, N. Alkemade, A. Nickerson, M. Creamer, A. C. McFarlane, D. Silove, R. A. Bryant and D. Forbes
- 236 **Using generic preference-based measures in mental health: psychometric validity of the EQ-5D and SD-6D**  
B. Mulhern, C. Mukuria, M. Barkham, M. Knapp, S. Byford, D. Soeteman and J. Brazier

## Short reports

- 244 **ANK3 gene expression in bipolar disorder and schizophrenia**  
K. V. Wirgenes, M. Tesli, E. Inderhaug, L. Athanasu, I. Agartz, I. Melle, T. Hughes, O. A. Andreassen and S. Djurovic
- 246 **Economic suicides in the Great Recession in Europe and North America**  
A. Reeves, M. McKee and D. Stuckler

## Columns

- 248 Correspondence  
249 Retraction  
249 Contents of *Advances in Psychiatric Treatment*  
250 Book reviews  
253 Contents of the *American Journal of Psychiatry*  
254 Kaleidoscope

- 255 **The temperance movement – in 100 words**  
Iain D. Smith

- 256 **From the Editor's desk**

## Cover picture

*Good Grief* (2008, acrylic on board).  
Neil Shah (b. 1985)

Dr Neil Shah is a psychiatry trainee working in East London. He has won awards for his artwork. He writes of this painting: 'Grief should be experienced naturally and should not be medicalised. It is a natural process; thus it is 'good' to grieve. The bold colours in the picture serve to challenge the negative stigma associated with grief. I wanted the piece to be attractive and to demonstrate that grieving people should not be ostracised. The two faces with contrasting colours represent the different aspects of grief. The distorted shapes are meant to illustrate that grief does not always follow a set course. Ultimately, I think that patients experiencing grief should do so naturally and be allowed to recover without the need for medication'.

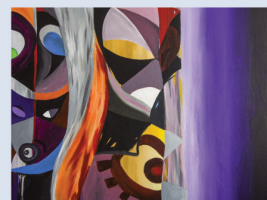

We are always looking for interesting and visually appealing images for the cover of the *Journal* and would welcome suggestions or pictures, which should be sent to Dr Allan Beveridge, British Journal of Psychiatry, 21 Prescot Street, London E1 8BB, UK or [bjp@rcpsych.ac.uk](mailto:bjp@rcpsych.ac.uk).
