# THE AMERICAN JOURNAL OF PSYCHIATRY

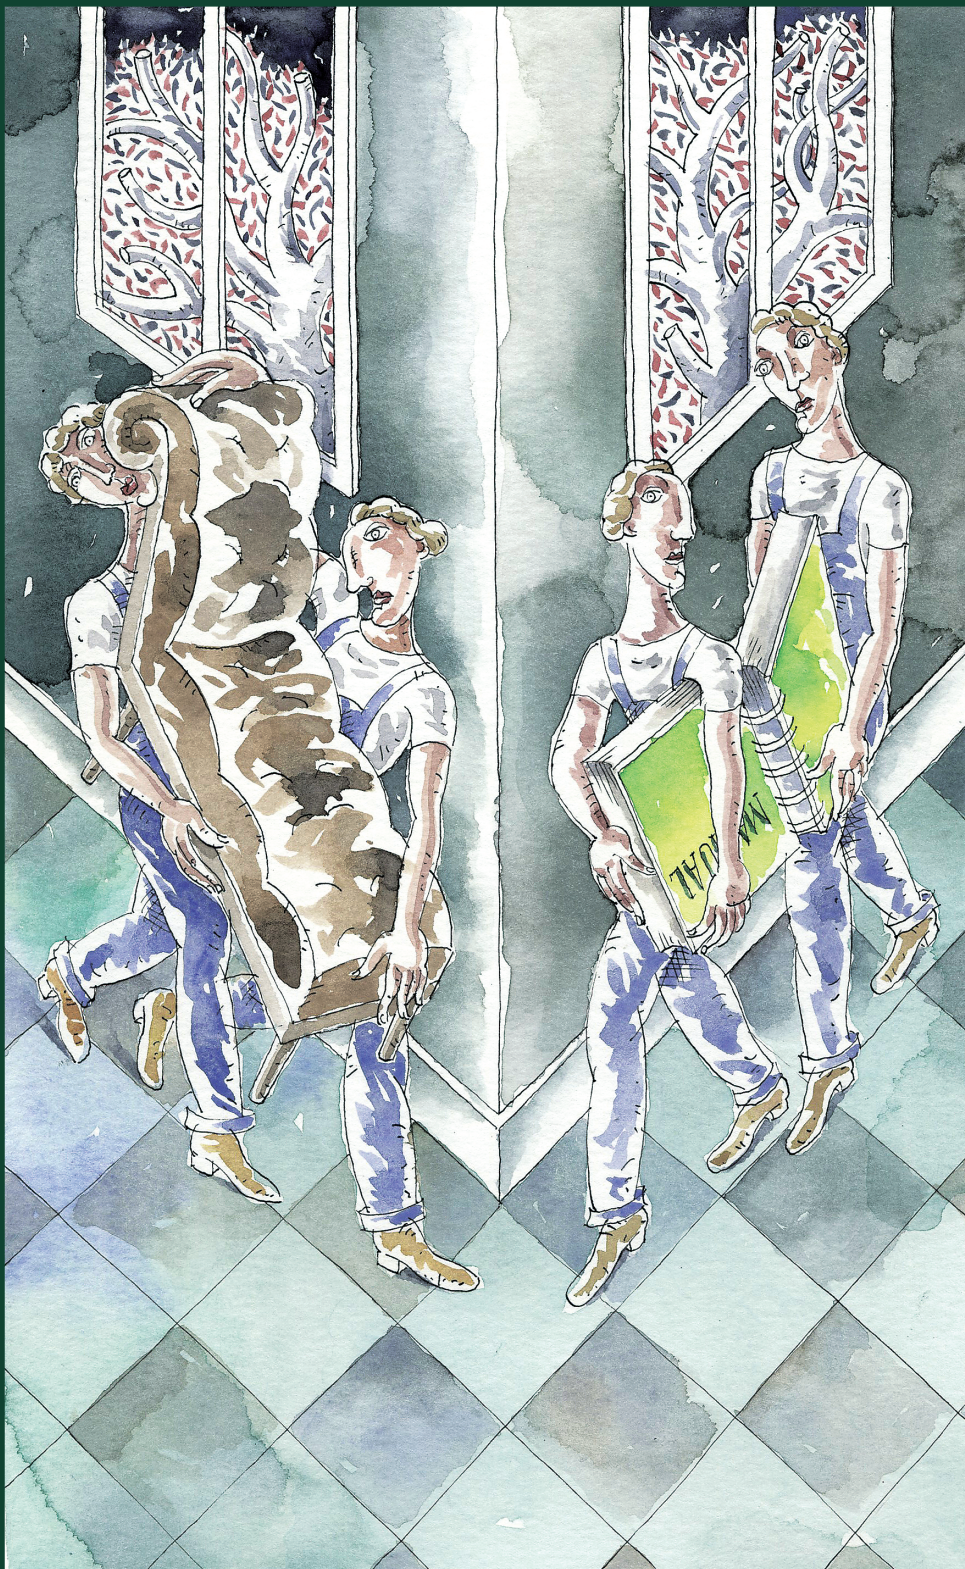

## What the BRAIN Initiative Means for Psychiatry

Cornelia I. Bargmann, Ph.D., and  
Jeffrey A. Lieberman, M.D.

1038

## Out of Sight, Out of Mind: Mental Illness Behind Bars

David R. Rubinow, M.D.

1041

## Exploration of the Patient-Therapist Relationship in Psychotherapy

Per Høglend, M.D., Ph.D.

1056

## ◀ Long-Term Outcome of Psychodynamic Therapy and Cognitive-Behavioral Therapy in Social Anxiety Disorder

Falk Leichsenring, D.Sc., et al.

1074

October 2014

Volume 171 • Number 10

Official Journal of the  
AMERICAN PSYCHIATRIC ASSOCIATION

[ajp.psychiatryonline.org](http://ajp.psychiatryonline.org)
